# Supplementary material for: A Human Genome-Wide RNAi Screen Reveals Diverse Modulators that Mediate IRE1α–XBP1 Activation
Source: Oxford University Press journal article supplement (doi:10.1158/1541-7786.mcr-17-0307), 2018-02-12
Supplement: 15417786mcr170307-sup-184783_2_supp_4518968_p2xs36.xlsx [file 15417786mcr170307-sup-184783_2_supp_4518968_p2xs36.xlsx]

## Sheet: Sheet1
List of candidate genes (z score <-1.5 for XBP-1-luciferase activity and z score >-0.5 for CMV-luciferase activity)
Symbol	Entrez Gene Name	Location	Type(s)	Drug(s)
ABCC1	ATP-binding cassette, sub-family C (CFTR/MRP), member 1	Plasma Membrane	transporter
ABCC6	ATP-binding cassette, sub-family C (CFTR/MRP), member 6	Plasma Membrane	transporter
ABHD6	abhydrolase domain containing 6	Cytoplasm	enzyme
AKAP1	A kinase (PRKA) anchor protein 1	Cytoplasm	other
AKR1C1/AKR1C2	aldo-keto reductase family 1, member C2 (dihydrodiol dehydrogenase 2; bile acid binding protein; 3-alpha hydroxysteroid dehydrogenase, type III)	Cytoplasm	enzyme
ANGPT4	angiopoietin 4	Extracellular Space	growth factor
ASH2L	ash2 (absent, small, or homeotic)-like (Drosophila)	Nucleus	transcription regulator
ATP11B	ATPase, class VI, type 11B	Plasma Membrane	transporter
ATP1A2	ATPase, Na+/K+ transporting, alpha 2 polypeptide	Plasma Membrane	transporter	digoxin, omeprazole, ethacrynic acid, perphenazine
ATP2A1	ATPase, Ca++ transporting, cardiac muscle, fast twitch 1	Cytoplasm	transporter
ATP6V0E1	ATPase, H+ transporting, lysosomal 9kDa, V0 subunit e1	Cytoplasm	transporter
ATP8A1	ATPase, aminophospholipid transporter (APLT), class I, type 8A, member 1	Cytoplasm	transporter
ATP8A2	ATPase, aminophospholipid transporter, class I, type 8A, member 2	Plasma Membrane	transporter
BCL10	B-cell CLL/lymphoma 10	Cytoplasm	transcription regulator
C21ORF81	chromosome 21 open reading frame 81	unknown	unknown
C21ORF88	chromosome 21 open reading frame 88	unknown	unknown
C6orf123	chromosome 6 open reading frame 123	unknown	unknown
CCKAR	cholecystokinin A receptor	Plasma Membrane	G-protein coupled receptor	dexloxiglumide, T-0632
CCT4	chaperonin containing TCP1, subunit 4 (delta)	Cytoplasm	other
CD19	CD19 molecule	Plasma Membrane	other	combotox, HD37-dgRTA, blinatumomab
CD79A	CD79a molecule, immunoglobulin-associated alpha	Plasma Membrane	transmembrane receptor
CDC40 (includes EG:361859)	cell division cycle 40 homolog (S. cerevisiae)	Nucleus	other
CDKN1B	cyclin-dependent kinase inhibitor 1B (p27, Kip1)	Nucleus	kinase
CDS2	CDP-diacylglycerol synthase (phosphatidate cytidylyltransferase) 2	Cytoplasm	enzyme
CENPE	centromere protein E, 312kDa	Nucleus	other
CHSY1	chondroitin sulfate synthase 1	Cytoplasm	enzyme
CLC	Charcot-Leyden crystal protein	Cytoplasm	enzyme
CLDN8	claudin 8	Plasma Membrane	other
CNTF	ciliary neurotrophic factor	Extracellular Space	cytokine
COL9A1	collagen, type IX, alpha 1	Extracellular Space	other	collagenase clostridium histolyticum
CPSF3	cleavage and polyadenylation specific factor 3, 73kDa	Nucleus	enzyme
MED26 (includes EG:306328)	mediator complex subunit 26	Nucleus	transcription regulator
CRYBA2	crystallin, beta A2	unknown	other
CSNK1A1	casein kinase 1, alpha 1	Cytoplasm	kinase
CTF1	cardiotrophin 1	Extracellular Space	cytokine
CYFIP2	cytoplasmic FMR1 interacting protein 2	Cytoplasm	other
DAG1	dystroglycan 1 (dystrophin-associated glycoprotein 1)	Plasma Membrane	transmembrane receptor
DDX3Y	DEAD (Asp-Glu-Ala-Asp) box polypeptide 3, Y-linked	Cytoplasm	enzyme
DDX47	DEAD (Asp-Glu-Ala-Asp) box polypeptide 47	Nucleus	enzyme
SERGEF	secretion regulating guanine nucleotide exchange factor	Cytoplasm	other
DGCR2	DiGeorge syndrome critical region gene 2	Plasma Membrane	other
FAM127B	family with sequence similarity 127, member B	unknown	unknown
INTS1	INTS1 integrator complex subunit 1	Cytoplasm	enzyme
DLX2	distal-less homeobox 2	Nucleus	transcription regulator
DPF2	D4, zinc and double PHD fingers family 2	Nucleus	other
RCAN2	regulator of calcineurin 2	unknown	other
DSPP	dentin sialophosphoprotein	Extracellular Space	other
HBEGF	heparin-binding EGF-like growth factor	Extracellular Space	growth factor
DUSP23	dual specificity phosphatase 23	Cytoplasm	phosphatase
DUSP9	dual specificity phosphatase 9	Nucleus	phosphatase
EDF1	endothelial differentiation-related factor 1	Nucleus	transcription regulator
EPO	erythropoietin	Extracellular Space	cytokine
CALHM2	calcium homeostasis modulator 2	unknown	other
FBXO4	F-box protein 4	Nucleus	enzyme
FKBP8	FK506 binding protein 8, 38kDa	Cytoplasm	other
PCNXL2	pecanex-like 2	unknown	unknown
LRRC40	leucine rich repeat containing 40	Cytoplasm	unknown
ESRP2	epithelial splicing regulatory protein 2	Cytoplasm	other
DCAKD	dephospho-CoA kinase domain containing	unknown	unknown
FLJ31222	uncharacterized LOC388387	unknown	unknown
ZNF792	zinc finger protein 792	unknown	unknown
CHM	choroideremia (Rab escort protein 1)	Cytoplasm	enzyme
FSIP2	fibrous sheath interacting protein 2	unknown	unknown
FRS3	fibroblast growth factor receptor substrate 3	Plasma Membrane	other
FRZB	frizzled-related protein	Extracellular Space	other
FSHB	follicle stimulating hormone, beta polypeptide	Extracellular Space	other
GBP5	guanylate binding protein 5	Plasma Membrane	enzyme
GCLM	glutamate-cysteine ligase, modifier subunit	Cytoplasm	enzyme
GDF3	growth differentiation factor 3	Extracellular Space	growth factor
STBD1	starch binding domain 1	Plasma Membrane	other
GRINA	glutamate receptor, ionotropic, N-methyl D-aspartate-associated protein 1 (glutamate binding)	unknown	ion channel
GTPBP1	GTP binding protein 1	Cytoplasm	enzyme
GUCA1A	guanylate cyclase activator 1A (retina)	Cytoplasm	other
H6PD	hexose-6-phosphate dehydrogenase (glucose 1-dehydrogenase)	Cytoplasm	enzyme
HELZ	helicase with zinc finger	Nucleus	enzyme
UBE2K	ubiquitin-conjugating enzyme E2K	Cytoplasm	transcription regulator
HNRNPK	heterogeneous nuclear ribonucleoprotein K	Nucleus	other
HNRNPL	heterogeneous nuclear ribonucleoprotein L	Nucleus	other
HNRNPU	heterogeneous nuclear ribonucleoprotein U (scaffold attachment factor A)	Nucleus	transporter
HOXD1	homeobox D1	Nucleus	transcription regulator
HS3ST2	heparan sulfate (glucosamine) 3-O-sulfotransferase 2	Cytoplasm	enzyme
CDR2L	cerebellar degeneration-related protein 2-like	unknown	unknown
IFNW1	interferon, omega 1	Extracellular Space	cytokine
IGF1R	insulin-like growth factor 1 receptor	Plasma Membrane	transmembrane receptor	OSI-906, cixutumumab, ganitumab, AVE1642, BIIB022, IGF1
IL17A	interleukin 17A	Extracellular Space	cytokine	secukinumab
IL17C	interleukin 17C	Extracellular Space	cytokine
IL22	interleukin 22	Extracellular Space	cytokine
IL9R	interleukin 9 receptor	Plasma Membrane	transmembrane receptor
ILVBL	ilvB (bacterial acetolactate synthase)-like	Cytoplasm	enzyme
IPO11	importin 11	Nucleus	transporter
KCNV2	potassium channel, subfamily V, member 2	Plasma Membrane	ion channel
KCTD12	potassium channel tetramerisation domain containing 12	unknown	ion channel
KEAP1	kelch-like ECH-associated protein 1	Cytoplasm	transcription regulator
KIAA0020	KIAA0020	Nucleus	other
KIAA0125	KIAA0125	unknown	other
RTF1	Rtf1, Paf1/RNA polymerase II complex component, homolog (S. cerevisiae)	Nucleus	other
TRIM66	tripartite motif containing 66	unknown	unknown
PREPL	prolyl endopeptidase-like	Cytoplasm	peptidase
KIAA0556	KIAA0556	Extracellular Space	other
ATP2C2	ATPase, Ca++ transporting, type 2C, member 2	Cytoplasm	enzyme
FAM131B	family with sequence similarity 131, member B	unknown	unknown
KIAA1033	KIAA1033	Cytoplasm	other
QSEC3	IQ motif and Sec7 domain 3	unknown	unknown
KLK5	kallikrein-related peptidase 5	Extracellular Space	peptidase
KNTC1	kinetochore associated 1	Nucleus	other
KPNA1	karyopherin alpha 1 (importin alpha 5)	Nucleus	transporter
KRT23	keratin 23 (histone deacetylase inducible)	unknown	other
KRT9	keratin 9	Cytoplasm	other
LDB2	LIM domain binding 2	Nucleus	transcription regulator
LLGL2	lethal giant larvae homolog 2 (Drosophila)	Cytoplasm	other
CLEC2D	C-type lectin domain family 2, member D	Plasma Membrane	other
LMOD1	leiomodin 1 (smooth muscle)	Cytoplasm	other
VASN	vasorin	unknown	unknown
LOC387701		unknown	unknown
LOC388444		unknown	unknown
LOC388454		unknown	unknown
LOC388554		unknown	unknown
LOC389167		unknown	unknown
LOC389170		unknown	unknown
LOC389273	uncharacterized LOC389273	unknown	other
LOC390006		unknown	unknown
LOC391769		unknown	unknown
RPS27P17	ribosomal protein S27 pseudogene 17	unknown	unknown
LOC400030		unknown	unknown
LOC400586		unknown	unknown
ZNF772	zinc finger protein 772	unknown	unknown
LOC401095		unknown	unknown
LOC401097		unknown	unknown
LOC401361		unknown	unknown
DAPL1	death associated protein-like 1	unknown	unknown
LRP12	low density lipoprotein receptor-related protein 12	Plasma Membrane	transmembrane receptor
LRP8	low density lipoprotein receptor-related protein 8, apolipoprotein e receptor	Plasma Membrane	transmembrane receptor
LSM4 (includes EG:25804)	LSM4 homolog, U6 small nuclear RNA associated (S. cerevisiae)	Nucleus	other
LYPLA1	lysophospholipase I	Cytoplasm	enzyme
MAFF	v-maf musculoaponeurotic fibrosarcoma oncogene homolog F (avian)	Nucleus	transcription regulator
MBD3L1	methyl-CpG binding domain protein 3-like 1	Nucleus	other
MCL1	myeloid cell leukemia sequence 1 (BCL2-related)	Cytoplasm	transporter
DUSP26	dual specificity phosphatase 26	Cytoplasm	phosphatase
MKKS	McKusick-Kaufman syndrome	Cytoplasm	other
MMP11	matrix metallopeptidase 11 (stromelysin 3)	Extracellular Space	peptidase
MOCS1	molybdenum cofactor synthesis 1	Cytoplasm	enzyme
MPZ	myelin protein zero	Plasma Membrane	other
MT1F	metallothionein 1F	Cytoplasm	other
ND4L (includes EG:17720)	NADH dehydrogenase, subunit 4L (complex I)	Cytoplasm	enzyme
MTX1	metaxin 1	Cytoplasm	transporter
MUC3A	mucin 3A, cell surface associated	Extracellular Space	other
MUC7	mucin 7, secreted	Extracellular Space	other
MXD4	MAX dimerization protein 4	Nucleus	transcription regulator
NAALADL1	N-acetylated alpha-linked acidic dipeptidase-like 1	Plasma Membrane	peptidase
NCBP1	nuclear cap binding protein subunit 1, 80kDa	Nucleus	other
NCOR2	nuclear receptor corepressor 2	Nucleus	transcription regulator
NKX2-5	NK2 homeobox 5	Nucleus	transcription regulator
NNMT	nicotinamide N-methyltransferase	Cytoplasm	enzyme
NT5M	5',3'-nucleotidase, mitochondrial	Cytoplasm	phosphatase
NUP155	nucleoporin 155kDa	Nucleus	transporter
OR2M4	olfactory receptor, family 2, subfamily M, member 4	Plasma Membrane	other
OR6C74	olfactory receptor, family 6, subfamily C, member 74	Plasma Membrane	G-protein coupled receptor
PIK3R5	phosphoinositide-3-kinase, regulatory subunit 5	Cytoplasm	other
TMED3	transmembrane emp24 protein transport domain containing 3	Cytoplasm	unknown
PDE5A	phosphodiesterase 5A, cGMP-specific	Cytoplasm	enzyme	dyphylline, nitroglycerin, DA-8159, aminophylline, sildenafil, dipyridamole, aspirin/dipyridamole, vardenafil, tolbutamide, tadalafil, theophylline, pentoxifylline
PEPD	peptidase D	Cytoplasm	peptidase
PHLDA3	pleckstrin homology-like domain, family A, member 3	Plasma Membrane	other
PIK3AP1	phosphoinositide-3-kinase adaptor protein 1	Cytoplasm	other
PIWIL2	piwi-like 2 (Drosophila)	Cytoplasm	other
PLA2G4B	phospholipase A2, group IVB (cytosolic)	Cytoplasm	enzyme
PLA2G4D	phospholipase A2, group IVD (cytosolic)	Cytoplasm	enzyme
PLAA	phospholipase A2-activating protein	Cytoplasm	other
PLAGL1	pleiomorphic adenoma gene-like 1	Nucleus	transcription regulator
FERMT2	fermitin family member 2	Cytoplasm	other
PLK3	polo-like kinase 3	Nucleus	kinase
POLR2D	polymerase (RNA) II (DNA directed) polypeptide D	Nucleus	enzyme
POLR2E	polymerase (RNA) II (DNA directed) polypeptide E, 25kDa	Nucleus	enzyme
POLR2I	polymerase (RNA) II (DNA directed) polypeptide I, 14.5kDa	Nucleus	transcription regulator
PPFIA3	protein tyrosine phosphatase, receptor type, f polypeptide (PTPRF), interacting protein (liprin), alpha 3	Plasma Membrane	phosphatase
PPP1R12A	protein phosphatase 1, regulatory subunit 12A	Cytoplasm	phosphatase
PPP1R15B	protein phosphatase 1, regulatory subunit 15B	Cytoplasm	phosphatase
PPT2 (includes EG:100126133)	palmitoyl-protein thioesterase 2	Cytoplasm	enzyme
PRCC	papillary renal cell carcinoma (translocation-associated)	Nucleus	other
PRDM11	PR domain containing 11	unknown	other
SMR3A	submaxillary gland androgen regulated protein 3A	Extracellular Space	other
PRPF31	PRP31 pre-mRNA processing factor 31 homolog (S. cerevisiae)	Nucleus	other
PRPF4B	PRP4 pre-mRNA processing factor 4 homolog B (yeast)	Nucleus	kinase
CYTIP	cytohesin 1 interacting protein	Cytoplasm	other
PSMB4	proteasome (prosome, macropain) subunit, beta type, 4	Cytoplasm	peptidase
QSOX1	quiescin Q6 sulfhydryl oxidase 1	Cytoplasm	enzyme
RAD51	RAD51 homolog (S. cerevisiae)	Nucleus	enzyme
RASA1	RAS p21 protein activator (GTPase activating protein) 1	Cytoplasm	transporter
RBPJ	recombination signal binding protein for immunoglobulin kappa J region	Nucleus	transcription regulator
RCL1	RNA terminal phosphate cyclase-like 1	Nucleus	enzyme
RNF40	ring finger protein 40	Cytoplasm	enzyme
RNH1	ribonuclease/angiogenin inhibitor 1	Cytoplasm	other
HSD17B6	hydroxysteroid (17-beta) dehydrogenase 6 homolog	Cytoplasm	enzyme
RPL36	ribosomal protein L36	Cytoplasm	other
RPL37A	ribosomal protein L37a	Cytoplasm	other
RRM1	ribonucleotide reductase M1	Nucleus	enzyme	gemcitabine, clofarabine, fludarabine phosphate
SCGB1A1	secretoglobin, family 1A, member 1 (uteroglobin)	Extracellular Space	cytokine
SEC61B	Sec61 beta subunit	Cytoplasm	transporter
SERPING1	serpin peptidase inhibitor, clade G (C1 inhibitor), member 1	Extracellular Space	other
SF3B1	splicing factor 3b, subunit 1, 155kDa	Nucleus	other
SLC13A2	solute carrier family 13 (sodium-dependent dicarboxylate transporter), member 2	Plasma Membrane	transporter
SLC25A12	solute carrier family 25 (mitochondrial carrier, Aralar), member 12	Cytoplasm	transporter
SLC7A6	solute carrier family 7 (amino acid transporter light chain, y+L system), member 6	Plasma Membrane	transporter
SLC9A3R1	solute carrier family 9 (sodium/hydrogen exchanger), member 3 regulator 1	Plasma Membrane	other
SMAD2	SMAD family member 2	Nucleus	transcription regulator
SOX21	SRY (sex determining region Y)-box 21	Nucleus	transcription regulator
SRCRB4D	scavenger receptor cysteine rich domain containing, group B (4 domains)	Plasma Membrane	transmembrane receptor
SRRM1	serine/arginine repetitive matrix 1	Nucleus	other
SS18L2	synovial sarcoma translocation gene on chromosome 18-like 2	unknown	other
SSNA1	Sjogren syndrome nuclear autoantigen 1	Plasma Membrane	other
SUPT6H	suppressor of Ty 6 homolog (S. cerevisiae)	Nucleus	transcription regulator
MED21	mediator complex subunit 21	Nucleus	transcription regulator
SYNJ2	synaptojanin 2	Cytoplasm	phosphatase
TAF7	TAF7 RNA polymerase II, TATA box binding protein (TBP)-associated factor, 55kDa	Nucleus	transcription regulator
MLX	MAX-like protein X	Nucleus	transcription regulator
TEAD1	TEA domain family member 1 (SV40 transcriptional enhancer factor)	Nucleus	transcription regulator
TFAM	transcription factor A, mitochondrial	Cytoplasm	transcription regulator
TPRA1	transmembrane protein, adipocyte asscociated 1	Plasma Membrane	G-protein coupled receptor
TRIM9	tripartite motif containing 9	Cytoplasm	enzyme
TROAP	trophinin associated protein (tastin)	Cytoplasm	peptidase
EFTUD2	elongation factor Tu GTP binding domain containing 2	Cytoplasm	enzyme
UBE3C	ubiquitin protein ligase E3C	Nucleus	enzyme
VAMP3	vesicle-associated membrane protein 3 (cellubrevin)	Plasma Membrane	other
VIM	vimentin	Cytoplasm	other
WIT-1	Wilms tumor associated protein	Cytoplasm	unknown
XAB2	XPA binding protein 2	Nucleus	other
XBP1 (includes EG:140614)	X-box binding protein 1	Nucleus	transcription regulator
ZNF619	zinc finger protein 619	unknown	other
