# Supplementary material for: A Human Genome-Wide RNAi Screen Reveals Diverse Modulators that Mediate IRE1α–XBP1 Activation
Source: Oxford University Press journal article supplement (doi:10.1158/1541-7786.mcr-17-0307), 2018-02-12
Supplement: 15417786mcr170307-sup-184783_2_supp_4518970_p2xs36.xlsx [file 15417786mcr170307-sup-184783_2_supp_4518970_p2xs36.xlsx]

## Sheet: Sheet1
4 out of 4 (36 out of 165)	3 out of 4 (57 out of 165)	2 out of 4 (51 out of 165)	1 out of 4 (18 out of 165)
ABCC1	ABCC6	ABHD6	ATP2A1
AKAP1	CENPE	ANGPT4	BCL10
CCT4	CLC	ASH2L	CDKN1B
CDC40	CLDN8	ATP11B	CHSY1
CDS2	CNTF	ATP1A2	DDX47
COL9A1	CRSP7	CCKAR	DUSP23
CPSF3	CSNK1A1	CD19	KIAA0703
CRYBA2	DGCR2	CD79A	KLK5
CWC22	DLX2	CTF1	LOC400720
DAG1	DPF2	CYFIP2	LRP8
DTR	DSPP	DDX3Y	LYPLA1
EPO	DUSP9	DSCR1L1	MXD4
FBXO4	ERN1	EDF1	NCOR2
GCLM	FKBP8	FAM26B	PIK3R5
GDF3	FLJ21918	FLJ20331	RPL37A
GUCA1A	FLJ22955	FLJ44048	SEC61B
HUMPPA	FLJ38451	GBP5	SYNJ2
IGF1R	GENX-3414	GRINA	ZNF619
IL17	H6PD	GTPBP1
IL22	HIP2	HELZ
KIAA0252	HNRPK	IFNW1
LRP12	HNRPL	KCTD12
LSM4	HNRPU	KIAA0436
NNMT	HOXD1	KIAA0556
NUP155	IL17C	KPNA1
PIWIL2	IPO11	LLGL2
PLEKHC1	KCNV2	LOC114990
POLR2E	KEAP1	LOC389170
POLR2I	KIAA1033	LOC391769
PSMB4	KNTC1	LOC92196
RRM1	KRT23	MAFF
SCGB1A1	KRT9	MT1F
SERGEF	LLT1	MUC7
SS18L2	MBD3L1	NT5M
TPRA40	MCL1	PLAGL1
XBP1	MGC1136	PLK3
	MKKS	PSCDBP
	MMP11	RAD51
	MOCS1	RASA1
	MPZ	RBPSUH
	MTX1	RNF40
	NKX2-5	RPL36
	OR2M4	SLC7A6
	OR6C74	SOX21
	PEPD	SSNA1
	PHLDA3	TCFL4
	PLA2G4D	TEAD1
	POLR2D	TFAM
	PRPF31	TRIM9
	PRPF4B	VIM
	QSCN6	XAB2
	RNH
	SLC13A2
	SLC9A3R1
	SRRM1
	TROAP
	UBE3C
